# Supplementary material for: An Effective Method for Lung Cancer Diagnosis from CT Scan Using Deep Learning-Based Support Vector Network
Source: MDPI journal article supplement (doi:10.3390/cancers14215457), 2022-11-06
Supplement: s1 [file s1]

## Article

# An Effective Method for Lung Cancer Diagnosis from CT Scan Using Deep Learning-Based Support Vector Network

Imran Shafi, Sadia Din, Asim Khan, Isabel De La Torre Díez, Ramón del Jesús Palí Casanova, Kilian Tutusaus Pifarre and Imran Ashraf

## Supplementary Material

**Table S1.** Acronyms used in this study.

| Acronym | Full Word                                            |
|---------|------------------------------------------------------|
| AM-FM   | Amplitude modulation frequency modulation            |
| ANN     | Artificial neural network                            |
| CAD     | Computer-aided design                                |
| CapsNet | Capsule network                                      |
| CNN     | Convolutional neural network                         |
| CT      | Computer tomography                                  |
| DCNN    | Deep convolutional neural network                    |
| DITNN   | Deep learning instantaneously train a neural network |
| DL      | Deep learning                                        |
| DNA     | Deoxyribonucleic acid                                |
| DIP     | Digital image processing                             |
| DT      | Decision tree                                        |
| F-CNN   | Fast regions with a convolution net                  |
| GBM     | Gradient boosting machine                            |
| GPU     | Graphical processing unit                            |
| IPCT    | Improved profuse clustering technique                |
| KNN     | K nearest neighbor                                   |
| MIP     | Maximum projection intensity                         |
| ML      | Machine learning                                     |
| NB      | Naïve Bayes                                          |
| PLSR    | Partial least squares regression                     |
| RBF     | Radial basis function                                |
| RF      | Random Forest                                        |
| ROI     | Region of interest                                   |
| SVM     | Support vector machine                               |

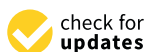

**Citation:** Shafi, I.; Din, S.; Khan, A.; Díez, I.D.L.T.; Casanova, R.d.P.; Pifarre, K.T.; Ashraf, I. An Effective Method for Lung Cancer Diagnosis from CT Scan Using Deep Learning-Based Support Vector Network. *Cancers* **2022**, *14*, 5457. <https://doi.org/10.3390/cancers14215457>

Academic Editor: Akiteru Goto

Received: 12 September 2022

Accepted: 2 November 2022

Published: 6 November 2022

**Publisher's Note:** MDPI stays neutral with regard to jurisdictional claims in published maps and institutional affiliations.

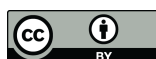

**Copyright:** © 2022 by the authors. Licensee MDPI, Basel, Switzerland. This article is an open access article distributed under the terms and conditions of the Creative Commons Attribution (CC BY) license (<https://creativecommons.org/licenses/by/4.0/>).

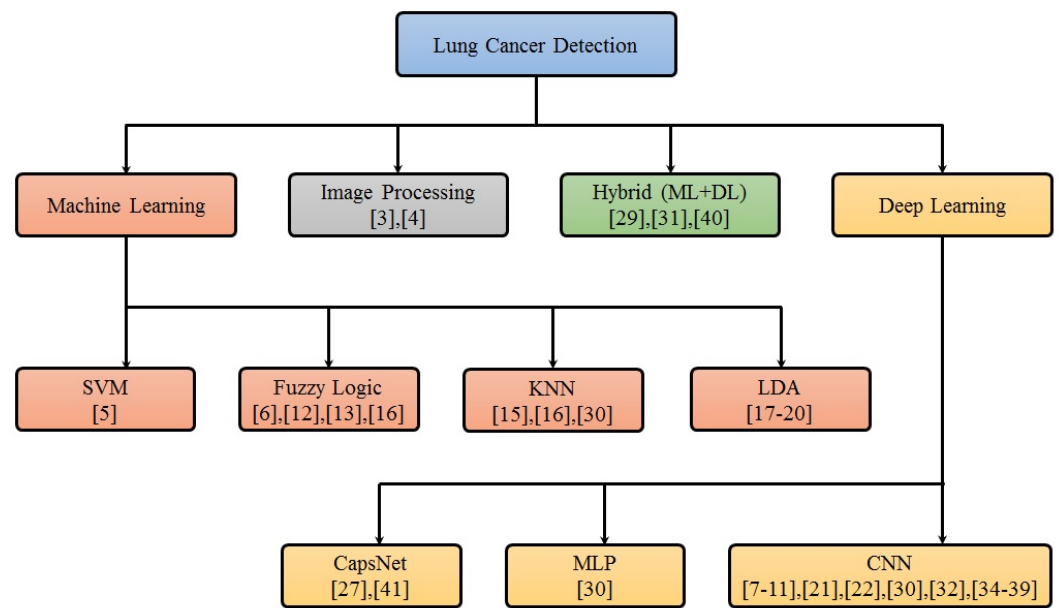

**Figure S1.** Types of methodologies for lung cancer detection.

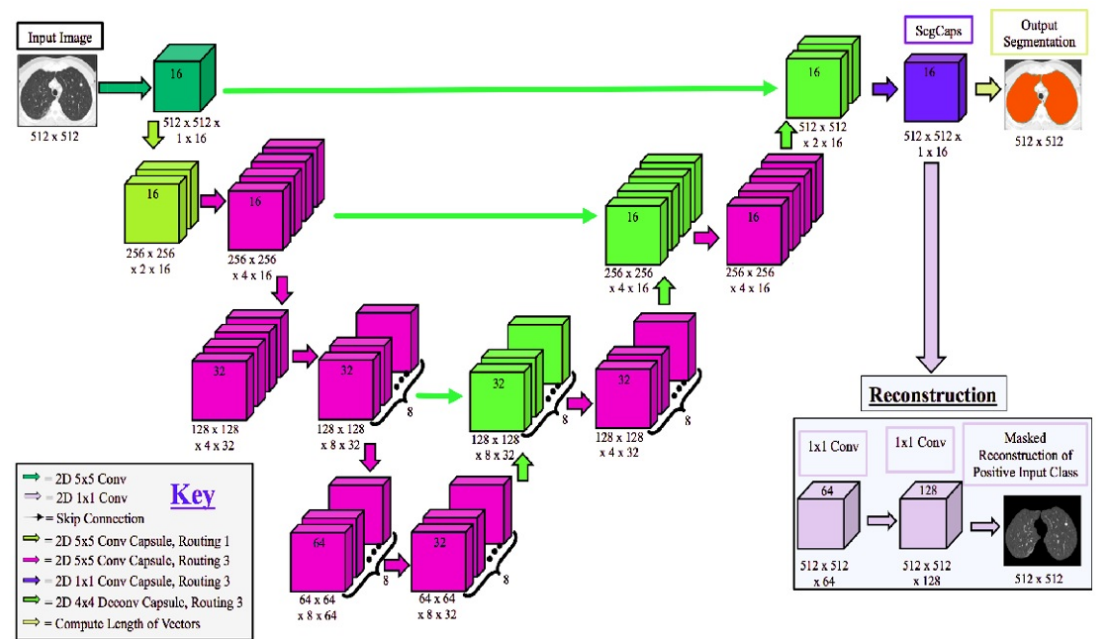

**Figure S2.** Capsule network model for lung segmentation.
